# Supplementary material
Source: Research Square preprint supplement (doi:10.21203/rs.3.rs-9801909/v1)
Supplement: Supplementary file 1 [file 745f08f24e133d22e622e513.docx]

**Supplementary Table S1.** Full database-specific search strings used for the systematic review.

| Database | Exact Search String Used |
| --- | --- |
| Scopus | TITLE-ABS-KEY ( ( clay OR montmorillonite OR bentonite OR halloysite OR sepiolite OR palygorskite OR kaolinite OR laponite OR "layered double hydroxide" OR ldh OR aminoclay ) AND ( polyphenol* OR antioxidant* OR anthocyanin* OR vitamin* OR peptide* OR nutraceutical* OR "essential oil*" OR curcumin OR flavonoid* ) AND ( stabilis* OR encapsulat* OR adsorb* OR "controlled release" OR intercalat* ) AND ( food* OR edible OR supplement* OR "oral formulation*" OR beverage* OR yogurt OR juice ) ) AND NOT TITLE-ABS-KEY ( packag* OR wastewater OR "soil remediation" OR cosmetic* OR veterinary ) |
| Web of Science (WoS) | TS=( ( clay OR montmorillonite OR bentonite OR halloysite OR sepiolite OR palygorskite OR kaolinite OR laponite OR "layered double hydroxide" OR ldh OR aminoclay ) AND ( polyphenol* OR antioxidant* OR anthocyanin* OR vitamin* OR peptide* OR nutraceutical* OR "essential oil*" OR curcumin OR flavonoid* ) AND ( stabilis* OR encapsulat* OR adsorb* OR "controlled release" OR intercalat* ) AND ( food* OR edible OR supplement* OR "oral formulation*" OR beverage* OR yogurt OR juice ) ) NOT TS=( packag* OR wastewater OR "soil remediation" OR cosmetic* OR veterinary ) |
| PubMed | ((clay[Title/Abstract] OR montmorillonite[Title/Abstract] OR bentonite[Title/Abstract] OR halloysite[Title/Abstract] OR sepiolite[Title/Abstract] OR palygorskite[Title/Abstract] OR kaolinite[Title/Abstract] OR laponite[Title/Abstract] OR "layered double hydroxide"[Title/Abstract] OR LDH[Title/Abstract] OR aminoclay[Title/Abstract]) AND (polyphenol*[Title/Abstract] OR antioxidant*[Title/Abstract] OR anthocyanin*[Title/Abstract] OR vitamin*[Title/Abstract] OR peptide*[Title/Abstract] OR nutraceutical*[Title/Abstract] OR "essential oil*"[Title/Abstract] OR curcumin[Title/Abstract] OR flavonoid*[Title/Abstract]) AND (stabilis*[Title/Abstract] OR encapsulat*[Title/Abstract] OR adsorb*[Title/Abstract] OR "controlled release"[Title/Abstract] OR intercalat*[Title/Abstract]) AND (food*[Title/Abstract] OR edible[Title/Abstract] OR supplement*[Title/Abstract] OR "oral formulation*"[Title/Abstract] OR beverage*[Title/Abstract] OR yogurt[Title/Abstract] OR juice[Title/Abstract])) NOT (packag*[Title/Abstract] OR wastewater[Title/Abstract] OR "soil remediation"[Title/Abstract] OR cosmetic*[Title/Abstract] OR veterinary[Title/Abstract]) |
